# Supplementary material for: Correlation between 18F-FDG maximum standardized uptake value with CD147 expression in lung adenocarcinomas: a retrospective study
Source: PeerJ. 2019 Sep 9;7:e7635. doi: 10.7717/peerj.7635 (PMC6741284; doi:10.7717/peerj.7635)
Supplement: Supplemental Information 1 [file peerj-07-7635-s001.xlsx]

## Sheet: 2013-2014
AGE1	Gender	Tumor size1	Tumor differentiation	Pathological N stage	Pathological TNM stage	CD147 IHC score	CD147	SUVmax	SUVmax1	SUVmean	SUVmean1	MTV	MTV1	TLG	TLG1	Overall Survival 1
0	0	0	0	0	0	0	0	0.87	0	0.8	0	1.48	0	1.18	0	0
1	0	0	0	0	0	0	0	1.23	0	1.1	0	0.81	0	0.89	0	0
0	1	0	0	0	0	0	0	1.41	0	1.33	0	1.33	0	1.77	0	0
1	1	1	1	0	1	0	0	1.77	0	0.98	0	52.43	1	51.38	0	0
1	0	0	0	0	0	0	0	1.93	0	1.88	0	0.49	0	0.92	0	0
1	1	0	0	0	0	0	0	2.31	0	1.65	0	4.35	1	7.17	0	0
0	0	1	1	1	2	0	0	2.35	0	1.8	0	11.87	1	21.4	0	0
1	0	0	0	0	0	0	0	2.4	0	1.9	0	2.18	0	4.14	0	0
1	1	1	0	0	0	0	0	2.61	0	1.82	0	22.82	1	41.63	0	0
1	1	0	0	0	0	0	0	2.63	0	1.78	0	7.04	1	12.54	0	0
1	1	1	1	0	0	0	0	2.68	0	1.82	0	7.39	1	13.47	0	0
1	0	1	0	0	1	0	0	2.96	0	2.36	0	13.87	1	32.78	0	0
1	0	0	2	1	1	0	0	3.05	0	1.91	0	3.96	0	7.58	0	0
0	0	0	1	0	0	0	0	3.34	0	2.23	0	5.09	1	11.33	0	0
1	0	0	1	1	1	0	0	3.87	0	2.66	0	1.26	0	3.35	0	0
0	1	0	1	0	0	0	0	4.1	0	2.54	0	2.83	0	7.19	0	0
0	1	0	1	1	2	0	0	4.42	0	2.88	0	1.7	0	4.9	0	0
0	1	0	0	0	0	0	0	4.46	0	2.78	0	3	0	8.32	0	0
0	0	0	2	0	0	0	0	6.08	0	3.86	0	2.52	0	9.73	0	0
0	1	0	0	0	0	0	0	6.09	0	4.01	0	2.26	0	9.07	0	0
1	1	0	1	0	0	0	0	7.82	0	5.13	0	1.35	0	6.91	0	0
1	1	1	1	1	2	0	0	8.01	0	5.23	0	10.91	1	57.11	1	0
0	0	0	0	1	1	0	0	8.49	0	6.52	1	3.01	0	19.62	0	0
1	0	0	0	0	0	0	0	8.82	0	6.67	1	4.01	0	26.76	0	0
1	1	0	0	0	0	0	0	9.52	0	6.07	0	2.91	0	17.66	0	0
0	1	0	1	0	0	0	0	9.66	0	5.99	0	2.09	0	12.52	0	0
1	1	0	0	0	0	0	0	9.72	0	6.19	0	3.13	0	19.39	0	0
0	0	1	1	1	2	0	0	10.39	1	5.82	0	9	1	52.35	0	0
1	0	0	1	1	2	0	0	10.78	1	7.95	1	3.03	0	24.08	0	0
1	0	1	2	0	0	0	0	10.9	1	6.24	0	2.35	0	14.67	0	0
0	1	0	2	0	0	0	0	11.37	1	6.98	1	2.91	0	20.34	0	0
1	1	0	1	0	0	0	0	11.95	1	11.22	1	0.5	0	5.61	0	0
0	0	0	2	1	2	0	0	12.05	1	7.9	1	1.22	0	9.62	0	1
0	0	1	0	0	0	0	0	12.07	1	7.09	1	12.87	1	91.23	1	0
1	1	0	2	0	0	0	0	12.63	1	10.1	1	4.12	1	41.63	0	0
1	1	1	2	0	0	0	0	13.04	1	7.87	1	3.26	0	25.67	0	1
0	0	0	2	1	2	0	0	13.32	1	8.92	1	5.82	1	51.94	0	0
1	0	1	2	0	0	0	0	13.57	1	8.11	1	12.43	1	100.77	1	1
0	0	0	2	1	1	0	0	14.07	1	9.82	1	7.61	1	74.7	1	0
0	0	0	2	0	0	0	0	16.15	1	10.07	1	3.69	0	37.17	0	0
1	0	1	1	1	2	0	0	16.97	1	10.54	1	36.6	1	385.72	1	0
1	1	0	1	1	2	0	0	17.08	1	10.54	1	2.3	0	24.25	0	1
0	0	0	0	0	0	4	1	4.68	0	3.2	0	3.13	0	10.02	0	0
0	0	1	1	0	0	1	1	4.77	0	2.86	0	20.39	1	58.32	1	0
1	1	0	2	1	2	3	1	5.06	0	3.25	0	1.3	0	4.23	0	1
1	0	0	1	0	0	2	1	5.11	0	3.37	0	2.13	0	7.18	0	0
0	1	0	1	0	0	2	1	7.55	0	4.63	0	2.74	0	12.69	0	0
1	0	0	2	0	0	6	1	8.67	0	5.84	0	2.91	0	17.01	0	1
0	0	0	1	1	2	4	1	9.3	0	5.84	0	1.65	0	9.63	0	1
0	0	1	2	1	1	4	1	9.81	1	6.41	1	10.48	1	67.17	1	0
1	0	0	0	0	0	4	1	10.27	1	10.01	1	2.48	0	24.82	0	0
1	1	0	0	0	0	2	1	10.49	1	6.37	1	1.3	0	8.3	0	1
0	1	0	0	0	0	3	1	10.53	1	6.59	1	1.96	0	12.91	0	0
1	0	1	1	1	1	2	1	10.56	1	6.57	1	26.51	1	174.23	1	0
1	1	0	1	1	2	3	1	10.56	1	6.77	1	1.78	0	12.05	0	1
0	1	0	1	0	0	6	1	10.62	1	7.01	1	2.13	0	14.94	0	1
1	1	0	2	0	0	2	1	11.24	1	6.98	1	2.61	0	18.22	0	0
0	0	1	2	0	0	4	1	11.25	1	6.93	1	10.26	1	71.11	1	0
1	0	1	2	0	2	6	1	11.5	1	6.98	1	142.35	1	993.34	1	1
1	0	0	2	1	1	2	1	11.61	1	7.84	1	1.66	0	13.02	0	1
1	0	1	2	1	2	9	1	11.91	1	9.69	1	13.03	1	126.28	1	1
1	0	0	2	0	0	4	1	12.42	1	8.01	1	1.26	0	10.1	0	0
0	1	0	0	1	2	2	1	12.64	1	7.55	1	2.83	0	21.37	0	0
0	0	1	2	1	2	3	1	13.09	1	8.29	1	18.95	1	157.08	1	1
1	1	0	1	1	2	4	1	13.3	1	11.1	1	4.03	1	44.73	0	0
0	0	1	2	1	1	1	1	13.76	1	8.65	1	36.9	1	319.23	1	1
0	1	0	2	1	2	2	1	14.13	1	9.01	1	3.39	0	30.55	0	0
0	1	0	2	0	0	3	1	14.33	1	9.81	1	3.13	0	30.69	0	0
1	0	0	1	0	0	1	1	14.58	1	9.38	1	3.43	0	32.17	0	0
1	0	1	2	1	1	4	1	14.75	1	9.35	1	6.3	1	58.9	1	0
0	1	1	2	1	2	4	1	14.82	1	10	1	11.69	1	116.95	1	1
0	0	1	2	1	1	4	1	16.51	1	11.08	1	46.59	1	516.32	1	0
1	0	0	0	0	0	4	1	17.13	1	10.35	1	7.43	1	76.89	1	1
0	0	0	2	1	2	4	1	17.25	1	14.14	1	5.54	1	78.34	1	0
0	0	0	1	0	0	3	1	17.41	1	11.29	1	1.91	0	21.56	0	1
1	0	1	2	0	0	9	1	17.62	1	10.48	1	6.3	1	66.04	1	0
0	1	1	1	1	2	6	1	17.64	1	12	1	7	1	84	1	0
1	1	0	2	0	0	4	1	18.02	1	11.06	1	2.3	0	25.45	0	0
1	0	1	1	1	1	4	1	18.24	1	11.24	1	16.26	1	182.75	1	0
1	0	1	2	0	0	6	1	18.41	1	11.42	1	7.3	1	83.37	1	0
0	0	1	2	1	1	6	1	19.17	1	12.49	1	37.95	1	474.03	1	0
1	1	1	1	1	2	12	1	20.26	1	13.35	1	9.39	1	125.34	1	0
1	1	1	2	1	2	6	1	21.21	1	12.42	1	2.22	0	27.57	0	0
0	0	1	1	0	0	9	1	21.87	1	19.85	1	13.51	1	268.17	1	1
1	0	0	2	1	2	9	1	22.54	1	14.59	1	3.39	0	49.47	0	0
0	0	1	1	0	0	9	1	23.52	1	15.11	1	9	1	135.98	1	0
1	1	1	2	1	2	3	1	25.56	1	16.32	1	7.87	1	128.45	1	1
0	1	1	2	1	2	12	1	29.52	1	19.81	1	13.87	1	274.83	1	0
0	1	1	2	1	2	12	1	37.55	1	22.66	1	5.13	1	116.26	1	1
